# Systematic Review of Antiretroviral-Associated Lipodystrophy: Lipoatrophy, but Not Central Fat Gain, Is an Antiretroviral Adverse Drug Reaction

Reneé de Waal\*, Karen Cohen, Gary Maartens\*

Division of Clinical Pharmacology, Department of Medicine, University of Cape Town, Cape Town, South Africa

## Abstract

**Background:** Lipoatrophy and/or central fat gain are observed frequently in patients on antiretroviral therapy (ART). Both are assumed to be antiretroviral adverse drug reactions.

**Methods:** We conducted a systematic review to determine whether fat loss or gain was more common in HIV-infected patients on ART than in uninfected controls; was associated with specific antiretrovirals; and would reverse after switching antiretrovirals.

**Results:** Twenty-seven studies met our inclusion criteria. One cohort study reported more lipoatrophy, less subcutaneous fat gain, but no difference in central fat gain in HIV-infected patients on ART than in controls. Randomised controlled trials (RCTs) showed more limb fat loss (or less fat gain) with the following regimens: stavudine (versus other nucleoside reverse transcriptase inhibitors (NRTIs)); efavirenz (versus protease inhibitors (PIs)); and NRTI-containing (versus NRTI-sparing). RCTs showed increased subcutaneous fat after switching to NRTI-sparing regimens or from stavudine/zidovudine to abacavir/tenofovir. There were no significant between-group differences in trunk and/or visceral fat gain in RCTs of various regimens, but results from efavirenz versus PI regimens were inconsistent. There was no significant between-group differences in central fat gain in RCTs switched to NRTI-sparing regimens, or from PI-containing regimens.

**Conclusions:** There is clear evidence of a causal relationship between NRTIs (especially thymidine analogues) and lipoatrophy, with concomitant PIs possibly having an ameliorating effect or efavirenz causing additive toxicity. By contrast, central fat gain appears to be a consequence of treating HIV infection, because it is not different from controls, is not linked to any antiretroviral class, and doesn't improve on switching.

**Citation:** de Waal R, Cohen K, Maartens G (2013) Systematic Review of Antiretroviral-Associated Lipodystrophy: Lipoatrophy, but Not Central Fat Gain, Is an Antiretroviral Adverse Drug Reaction. PLoS ONE 8(5): e63623. doi:10.1371/journal.pone.0063623

**Editor:** Jean-Luc E P H Darlix, Institut National de la Santé et de la Recherche Médicale, France

**Received:** November 19, 2012; **Accepted:** April 4, 2013; **Published:** May 28, 2013

**Copyright:** © 2013 de Waal et al. This is an open-access article distributed under the terms of the Creative Commons Attribution License, which permits unrestricted use, distribution, and reproduction in any medium, provided the original author and source are credited.

**Funding:** These authors have no support or funding to report.

**Competing Interests:** The authors have declared that no conflicts of interest exist.

\* E-mail: renee.dewaal@uct.ac.za (RD); gary.maartens@uct.ac.za (GM)

## Introduction

Fat redistribution, also called lipodystrophy, is frequently observed in patients on long term antiretroviral therapy (ART) [1]. Some patients develop subcutaneous fat loss, or lipoatrophy; others gain fat, particularly in the breasts, dorsocervical fat pads, and viscera. Individuals with mixed phenotypes of fat loss and fat gain also occur commonly. Fat redistribution is also associated with metabolic abnormalities, notably dyslipidaemia and insulin resistance, which increase the risk of cardiovascular disease [2].

Lipoatrophy has been associated with exposure to thymidine analogue nucleoside reverse transcriptase inhibitors (NRTIs) [3]. Central fat gain is also assumed to be an adverse drug reaction [4]. However, there is evidence that visceral abdominal fat in HIV-infected patients on ART is not increased relative to healthy controls [5]. Untreated HIV infection eventually results in wasting, including loss of adipose tissue. Fat gain, which is widely prevalent in the general population and increases with age, may in part be the result of effective ART reversing fat loss due to HIV infection. It is important to determine whether lipodystrophy is an adverse

drug reaction to avoid unnecessary drug substitutions which may result in risks of virologic failure, new toxicities, and undermining patient confidence if the lipodystrophy does not improve. Treatment adherence is compromised when patients believe they have lipodystrophy from antiretrovirals [6].

If fat loss and fat gain were adverse antiretroviral drug reactions they would occur more commonly in HIV-infected patients on ART than in HIV-uninfected controls. Second, fat loss and/or fat gain would be associated with specific antiretroviral drugs or drug classes. Third, fat loss and/or fat gain would reverse after switching the identified antiretroviral drugs. We conducted a systematic review to test those three assumptions.

## Methods

### Eligibility criteria

**Types of studies.** To answer the question 'Does fat loss and/or fat gain occur more commonly in patients on ART than in HIV-uninfected controls?' we included prospective cohort studies

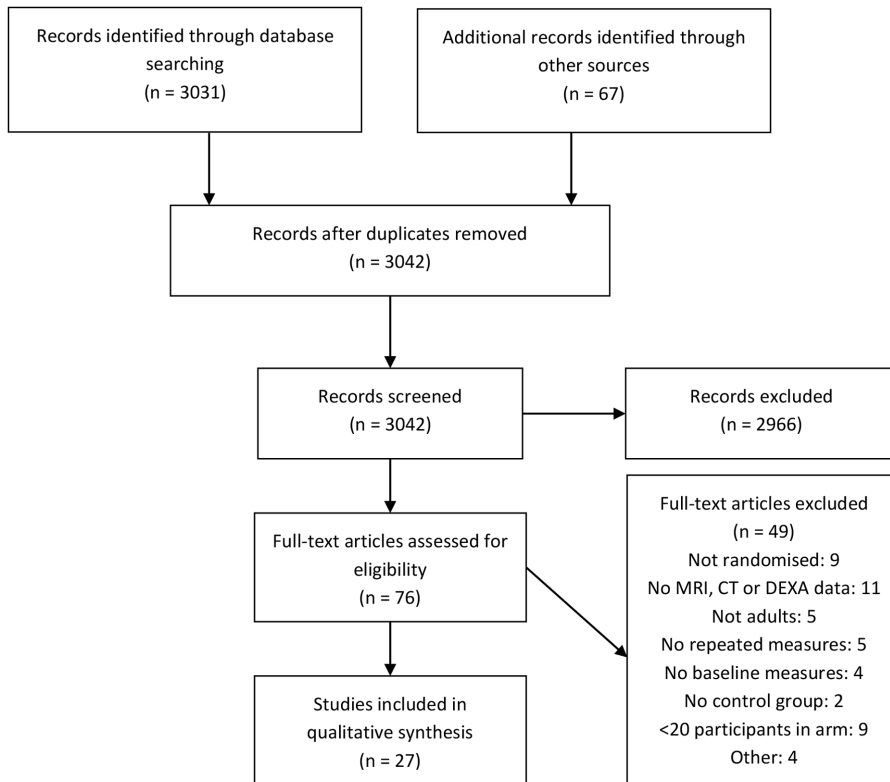

**Figure 1. Flow diagram of study selection.**

doi:10.1371/journal.pone.0063623.g001

comparing HIV-infected patients with ART exposure to population controls either known or presumed to be HIV-uninfected. To answer the questions ‘Is fat loss and/or fat gain associated with specific antiretroviral drugs?’ we included randomised controlled trials comparing antiretroviral regimens. To answer the question ‘Is fat loss and/or fat gain reversed after switching antiretroviral drugs?’ we included studies where participants with virologic suppression were randomised to continue their current ART regimen or switch to an alternative regimen.

**Participants.** We included both ART-naïve and ART-experienced HIV-infected patients who were at least 12 years old. For the cohort studies we included control participants who were presumed to be HIV-uninfected. We excluded studies with fewer than 20 participants in any arm.

**Interventions.** We included studies that used any antiretroviral regimens, given for at least 24 weeks, with the exception of those containing hydroxyurea.

**Outcome measures.** We included studies with at least one objective measure of fat distribution done at baseline, and repeated at least once, at a minimum of 24 weeks after baseline. Objective methods of measuring fat distribution included: dual-energy x-ray absorptiometry (DEXA), computerized tomography (CT), or magnetic resonance imaging (MRI). We included measures done both as primary or secondary outcomes, and in the whole study population, or within a sub-study. Specific outcomes included:

To assess fat loss:

- Change from baseline in limb fat
- Change from baseline in subcutaneous adipose tissue (SAT)
- Proportion with  $\geq 20\%$  loss in limb fat

- Proportion with  $\geq 20\%$  loss in SAT

To assess fat gain:

- Change from baseline in trunk fat
- Change from baseline in visceral adipose tissue (VAT)
- Proportion with  $\geq 20\%$  gain in trunk fat
- Proportion with  $\geq 20\%$  gain in VAT.

### Search strategies

We searched two electronic journal databases, PubMed and EMBASE, for articles published between 1 January 1990 and 7 July 2011. We hand-searched electronic databases for the Conferences on Retroviruses and Opportunistic Infections and the International AIDS Society conferences, from 2001. There was no language restriction, provided that an English translation of the abstract was available. The PubMed search strategy terms were as follows:

HIV Infections[MeSH] OR HIV[MeSH] OR hiv[tw] OR hiv-1\*[tw] OR hiv-2\*[tw] OR hiv1[tw] OR hiv2[tw] OR hiv infect\*[tw] OR human immunodeficiency virus[tw] OR human immunodeficiency virus[tw] OR human immuno-deficiency virus[tw] OR human immune-deficiency virus[tw] OR ((human immun\*) AND (deficiency virus[tw])) OR acquired immunodeficiency syndrome[tw] OR acquired immunodeficiency syndrome[tw] OR acquired immuno-deficiency syndrome[tw] OR acquired immune-deficiency syndrome[tw] OR ((acquired immun\*) AND (deficiency syndrome[tw])) OR “sexually transmitted diseases, viral”[MH:noexp]  
AND

**Table 1.** Characteristics of included studies.

| Study   | Year published | DEXA/CT/MRI population | n   | ART experience | Lipodystrophy                                    | Age group  | Duration of follow up | Primary endpoint(s)                     |
|---------|----------------|------------------------|-----|----------------|--------------------------------------------------|------------|-----------------------|-----------------------------------------|
| [8]     | 2010           | Whole study            | 691 | Experienced    | Patients with and without lipodystrophy included | ≥ 18 years | 5 years               | SAT, VAT                                |
| [3]     | 2011           | Sub-study              | 269 | Naïve          | NA                                               | ≥ 16 years | 192 weeks             | Lipoatrophy (DEXA)                      |
| [9]     | 2011           | Sub-study              | 63  | Naïve          | NA                                               | NR         | 96 weeks              | Efficacy                                |
| [10]    | 2010           | Sub-study              | 112 | Naïve          | NA                                               | ≥ 18 years | 96 weeks              | Efficacy                                |
| [11]    | 2010           | Sub-study              | 156 | Experienced    | NR                                               | ≥ 18 years | 48 weeks              | Efficacy                                |
| [4]     | 2009           | Whole study            | 66  | Experienced    | NR                                               | ≥ 18 years | 48 weeks              | Mitochondrial changes                   |
| [12]    | 2009           | Whole study            | 48  | Naïve          | NA                                               | 18–70      | 24 months             | LF, SAT, VAT                            |
| [13]    | 2009           | Whole study            | 757 | Naïve          | NA                                               | ≥ 13 years | 96 weeks              | Lipoatrophy (DEXA)                      |
| [14]    | 2009           | Sub-study              | 47  | Experienced    | Patients with and without lipodystrophy included | Adult      | 48 weeks              | Efficacy                                |
| [15]    | 2009           | Whole study            | 200 | Naïve          | NA                                               | Adult      | 96 weeks              | Efficacy and safety                     |
| [32]    | 2009           | Whole study            | 101 | Experienced    | Self-reported lipoatrophy                        | NR         | 48 weeks              | STF                                     |
| [16]    | 2009           | Whole study            | 357 | Experienced    | NR                                               | ≥ 18 years | 96 weeks              | Efficacy                                |
| [17]    | 2008           | Sub-study              | 140 | Naïve          | NA                                               | ≥ 18 years | 48 weeks              | LF                                      |
| [18]    | 2008           | Whole study            | 117 | Naïve          | NA                                               | ≥ 18 years | 96 weeks              | LF at 96 weeks                          |
| [19]    | 2008           | Whole study            | 155 | Naïve          | NA                                               | NR         | 96 weeks              | Efficacy                                |
| [20,33] | 2007           | Sub-study              | 157 | Naïve          | NA                                               | NR         | 144 weeks             | Changes in glucose and lipid metabolism |
| [21]    | 2007           | Sub-study              | 62  | Experienced    | Patients with and without lipodystrophy included | NR         | > 96 weeks            | LF                                      |
| [22]    | 2007           | Sub-study              | 57  | Naïve          | NA                                               | Adult      | 96 weeks              | Clinical lipoatrophy                    |
| [23]    | 2006           | Whole study            | 105 | Experienced    | Lipoatrophy                                      | ≥ 18 years | 48 weeks              | LF                                      |
| [24]    | 2006           | Sub-study              | 211 | Naïve          | NA                                               | ≥ 16 years | 48 weeks              | VAT                                     |
| [25]    | 2012           | Whole study            | 200 | Experienced    | Abdominal fat accumulation                       | ≥ 18 years | 96 weeks              | TF:LF                                   |
| [26]    | 2012           | Sub-study              | 74  | Experienced    | NR                                               | ≥ 18 years | 48 weeks              | VAT                                     |
| [27]    | 2011           | Whole study            | 142 | Experienced    | NR                                               | Adult      | 48 weeks              | LF                                      |
| [28]    | 2009           | Sub-study              | 100 | Experienced    | NR                                               | ≥ 18 years | 48 weeks              | Change in haemoglobin                   |
| [29]    | 2008           | Whole study            | 100 | Experienced    | Self-reported lipoatrophy                        | ≥ 18 years | 96 weeks              | STF                                     |
| [30]    | 2002           | Whole study            | 106 | Experienced    | Clinical lipoatrophy                             | > 18 years | 24 weeks              | LF                                      |
| [31]    | 2001           | Whole study            | 106 | Experienced    | Clinical lipodystrophy                           | Adult      | 48 weeks              | Efficacy                                |

LF: limb fat; NA: not applicable – treatment-naïve patients; NR: not reported; SAT: subcutaneous adipose tissue; STF: subcutaneous thigh fat; TF: trunk fat; VAT: visceral adipose tissue.  
doi:10.1371/journal.pone.0063623.t001

**Table 2.** Change from baseline in limb fat (LF) on DEXA scan, and subcutaneous thigh fat (STF) and subcutaneous adipose tissue (SAT) on CT scan: NRTI-containing regimens versus NRTI-sparing regimens.

| Study | Measure           | Arm                          | Week 48 (n)                                                 | p value                          | Week 96 (n)              | p value                |                       |
|-------|-------------------|------------------------------|-------------------------------------------------------------|----------------------------------|--------------------------|------------------------|-----------------------|
| [9]   | LF <sup>a</sup>   | LPVr+AZT+3TC                 | -703 g (22)                                                 | 0.014                            | -1930 g (5)              | >0.05                  |                       |
|       |                   | LPVr monotherapy             | -63 g (41)                                                  |                                  | -400 g (8)               |                        |                       |
| [4]   | LF <sup>a,b</sup> | LPVr+ continue 2NRTIs        | 12.2; 13.4 (33 <sup>d</sup> )                               | NR                               | ND                       | NA                     |                       |
|       |                   | NVP+LPVr                     | 11.1; 14.1 (33 <sup>d</sup> )                               |                                  | ND                       |                        |                       |
| [12]  | LF <sup>e</sup>   | AZT+3TC+LPVr                 | 6360 (5919 to 6801); 6520 (6059 to 6981) (22 <sup>d</sup> ) | NR                               | 5980 (5519 to 6441)      | NR                     |                       |
|       |                   | NVP+LPVr                     | 6360 (5968 to 6752); 7030 (6618 to 7442) (26 <sup>d</sup> ) |                                  | 7210 (6789 to 7631)      |                        |                       |
|       | SAT <sup>e</sup>  | AZT+3TC+LPVr                 | 118 (107 to 129); 126 (114 to 138) (22 <sup>d</sup> )       | NR                               | 123 (111 to 135)         | NR                     |                       |
|       |                   | NVP+LPVr                     | 118 (108 to 128); 132 (121 to 143) (26 <sup>d</sup> )       |                                  | 142 (131 to 153)         |                        |                       |
| [13]  | LF <sup>a</sup>   | EFV+3TC+(TDF or AZT or D4T)  | 8.9% <sup>g</sup> (188)                                     | NR                               | 1.4% (171)               | <0.001 vs NRTI-sparing |                       |
|       |                   | LPVr+3TC+(TDF or AZT or D4T) | 10.1% <sup>g</sup> (191)                                    |                                  | 9.8% (166)               |                        | 0.013 vs NRTI-sparing |
|       |                   | EFV+LPVr (NRTI-sparing)      | 14.2% <sup>g</sup> (197)                                    |                                  | 17.6% (173)              |                        |                       |
| [32]  | STF <sup>a</sup>  | ABC+continue other ARVs      | 18% (42)                                                    | 0.57                             | ND                       | NA                     |                       |
|       |                   | LPVr+NVP                     | 17% (46)                                                    |                                  | ND                       |                        |                       |
|       | SAT <sup>a</sup>  | ABC+continue other ARVs      | 29% (43)                                                    | 0.6                              | ND                       | NA                     |                       |
|       |                   | LPVr+NVP                     | 33% (47)                                                    |                                  | ND                       |                        |                       |
| [18]  | LF <sup>e</sup>   | PIr+2NRTIs                   | 0.37 kg (28)                                                | 0.253 vs NNRTI+PIr               | ND                       | NA                     |                       |
|       |                   | NNRTI+2NRTIs                 | 0.9 kg (21)                                                 | 0.298 <sup>h</sup> vs PIr+2NRTIs | ND                       | NA                     |                       |
|       |                   | NNRTI+PIr                    | 0.79 kg (49)                                                | 0.793 vs NRTI+2NRTIs             | ND                       | NA                     |                       |
| [21]  | LF <sup>a</sup>   | EFV+2NRTIs <sup>i</sup>      | -242 g (25)                                                 | 0.086                            | -850 g (25) <sup>j</sup> | 0.002                  |                       |
|       |                   | LPVr+EFV                     | 562 g (22)                                                  |                                  | 782 g (22) <sup>j</sup>  |                        |                       |
| [11]  | LF <sup>a</sup>   | DRVr+ continue 2NRTIs        | -0.26% (74)                                                 | <0.001                           | ND                       | NA                     |                       |
|       |                   | DRVr monotherapy             | 8.3% (67)                                                   |                                  | ND                       |                        | NA                    |

a. median; b. leg fat; c. absolute values at each time-point (change from baseline not reported); d. n at baseline (n at time-point not reported); e. mean; f. means (corrected for differences in baseline values) and 95% confidence intervals (calculated by the authors of this review) at each time-point (change from baseline not reported); g. values derived from graph; h. calculated by authors of this review; i. DDI+3TC or DDI+AZT or AZT+3TC or D4T+ 3TC or DDI+D4T; j. at last visit (median 102 weeks).

NA: not applicable; ND: not done; NR: not reported.

Antiretrovirals: 3TC: lamivudine; ABC: abacavir; AZT: zidovudine; D4T: stavudine; DRVr: ritonavir-boosted darunavir; EFV: efavirenz; LPVr: ritonavir-boosted lopinavir; NVP: nevirapine; PIr: ritonavir-boosted PI; TDF: tenofovir.

doi:10.1371/journal.pone.0063623.t002

Search Antiretroviral Therapy, Highly Active[MeSH] OR Anti-Retroviral Agents[MeSH] OR Antiviral Agents[MeSH:-NoExp] OR ((anti) AND (hiv[tw])) OR antiretroviral\*[tw] OR ((anti) AND (retroviral\*[tw])) OR HAART[tw] OR ((anti) AND (acquired immunodeficiency[tw])) OR ((anti) AND (acquired immunodeficiency[tw]))

OR  
Search zalcitabine OR zidovudine OR lamivudine OR stavudine OR didanosine OR tenofovir OR abacavir OR emtricitabine OR nevirapine OR efavirenz OR delavirdine OR etravirine OR rilpivirine OR amprenavir OR atazanavir OR

tipranavir OR indinavir OR saquinavir OR lopinavir OR fosamprenavir OR ritonavir OR darunavir OR nelfinavir OR enfurviride OR maraviroc OR raltegravir

AND

Search Lipodystrophy[mh] OR lipodystrophy[tiab] OR lipodystrophy[tiab] OR lipodystrophies[tiab] OR lipohypertrophy[tiab] OR lipoatrophy[tiab] OR body fat distribution[mh] OR fat[tiab] OR fats[tiab] OR abdominal fat[mh] OR adipose tissue[mh] OR adipose [tiab] OR adiposity[tiab] OR temporal wasting[tiab] OR buffalo hump[tiab].

**Table 3.** Change from baseline in limb fat (LF) on DEXA scan and subcutaneous adipose tissue (SAT) on CT scan: PI versus NNRTI.

| Study   | Measure           | Arm                                          | Week 48 (n)                                                      | p value           | Week 96 (n)              | p value |
|---------|-------------------|----------------------------------------------|------------------------------------------------------------------|-------------------|--------------------------|---------|
| [3]     | LF <sup>a</sup>   | ATVr+(ABC+3TC or TDF+FTC)                    | 25.2% <sup>b</sup> (105)                                         | NR                | 30.4% (94)               | 0.01    |
|         |                   | EFV+(ABC+3TC or TDF+FTC)                     | 17.7% <sup>b</sup> (112)                                         |                   | 16.5% (109)              |         |
| [13]    | LF <sup>c</sup>   | LPVr+3TC+(TDF or AZT or D4T)                 | 10.1% <sup>b</sup> (191)                                         | NR                | 9.8% (166)               | 0.007   |
|         |                   | EFV+3TC+(TDF or AZT or D4T)                  | 8.9% <sup>b</sup> (188)                                          |                   | 1.4% (171)               |         |
| [18]    | LF <sup>a</sup>   | PIr+2NRTIs                                   | 0.37 kg (28)                                                     | 0.30 <sup>d</sup> | ND                       | NA      |
|         |                   | NNRTI+2NRTIs                                 | 0.9 kg (21)                                                      |                   | ND                       |         |
| [19]    | LF <sup>c</sup>   | LPVr+AZT+3TC or LPV monotherapy <sup>e</sup> | 11.8% (NR)                                                       | NR                | 18.5% <sup>b</sup> (74)  | NR      |
|         |                   | EFV+AZT+3TC                                  | 3.1% (NR)                                                        |                   | -9% <sup>b</sup> (32)    |         |
| [24]    | SAT <sup>a</sup>  | ATV+AZT+3TC                                  | 12.8 cm <sup>2b</sup> (62). 95% CI for difference: -16.8 to 27.5 | NR                | ND                       | NA      |
|         |                   | EFV+AZT+3TC                                  | 7.6 cm <sup>2b</sup> (47)                                        |                   | ND                       |         |
| [20,33] | LF <sup>c,f</sup> | NFV+(AZT+3TC or DDI+D4T)                     | -4.7% <sup>b</sup> (23)                                          | NR                | -23.7% <sup>b</sup> (11) | NR      |
|         |                   | EFV+(AZT+3TC or DDI+D4T)                     | 1.5% <sup>b</sup> (26)                                           |                   | 9.9% <sup>b</sup> (16)   |         |

a. mean; b. values derived from graph; c. median; d. calculated by authors of this review; e. if virologically suppressed for 3 months; f. as-treated analysis.

NA: not applicable; ND: not done; NR: not reported.

Antiretrovirals: 3TC: lamivudine; ABC: abacavir; ATV: atazanavir; ATVr: ritonavir-boosted atazanavir; AZT: zidovudine; D4T: stavudine; DDI: didanosine; EFV: efavirenz; FTC: emtricitabine; LPVr: ritonavir-boosted lopinavir; NFV: nelfinavir; TDF: tenofovir.

doi:10.1371/journal.pone.0063623.t003

### Data collection

Two authors (RdW and KC) independently reviewed all study abstracts identified by the search strategy, using a specially designed eligibility form. We obtained the full articles, conference abstracts or conference posters for all studies that met the inclusion criteria. An independent translator reviewed articles that were published in languages other than English. We resolved disagreements as to study eligibility through consensus and discussion with the third author (GM) if necessary. One author (RdW) extracted data using a data extraction form; another author (KC) checked

the extracted data. Two authors (RdW and KC) assessed the risk of bias of all included studies [7].

### Results

We identified a total of 27 studies for inclusion in the review: one cohort study comparing HIV-infected patients with controls [8]; 18 randomised controlled trials comparing antiretroviral regimens [3,4,9–24]; seven switching studies [25–31]; and one study that fulfilled the criteria for both randomised controlled trials and switching studies [32]. Our search of PubMed and Embase

**Table 4.** Change from baseline in limb fat (LF) on DEXA scan and subcutaneous adipose tissue (SAT) on CT scan: NRTI versus NRTI.

| Study   | Measure           | Arm                          | Week 48 (n)                 | p value | Week 96 (n)              | p value |
|---------|-------------------|------------------------------|-----------------------------|---------|--------------------------|---------|
| [3]     | LF <sup>a</sup>   | ABC+3TC+(ATVr or EFV)        | 22.8% <sup>b</sup> (107)    | NR      | 24.9% (102)              | 0.46    |
|         |                   | TDF+FTC+(ATVr or EFV)        | 19.7% <sup>b</sup> (110)    |         | 20.9% (101)              |         |
| [14]    | LF <sup>c</sup>   | ABC+3TC+continue PI or NNRTI | 104 g (23)                  | 0.92    | ND                       | NA      |
|         |                   | TDF+FTC+continue PI or NNRTI | 75 g (24)                   |         | ND                       |         |
| [22]    | LF <sup>a</sup>   | ABC+3TC+EFV                  | 686 g (25)                  | 0.001   | 913 g (25)               | <0.001  |
|         |                   | D4T+3TC+EFV                  | -1164 g (32)                |         | -1578 g (32)             |         |
| [23]    | LF <sup>a</sup>   | ABC+continue other ARVs      | 483 g (44)                  | 0.37    | ND                       | NA      |
|         |                   | TDF+continue other ARVs      | 329 g (49)                  |         | ND                       |         |
|         | SAT <sup>a</sup>  | ABC+continue other ARVs      | 8.0 cm <sup>2</sup> (44)    | 0.96    | ND                       | NA      |
|         |                   | TDF+continue other ARVs      | 8.4 cm <sup>2</sup> (49)    |         | ND                       |         |
| [20,33] | LF <sup>c,d</sup> | DDI+D4T+(EFV or NFV)         | -11.9% <sup>b</sup> (42)    | NR      | -26.4% <sup>b</sup> (22) | NR      |
|         |                   | AZT+3TC+(EFV or NFV)         | 1.6% <sup>b</sup> (39)      |         | 1.7% <sup>b</sup> (24)   |         |
| [16]    | LF <sup>a</sup>   | ABC+3TC+continue NNRTI or PI | 0.3 kg (179 <sup>e</sup> )  | 0.4     | 0.53 kg (NR)             | 0.46    |
|         |                   | TDF+FTC+continue NNRTI or PI | 0.19 kg (178 <sup>e</sup> ) |         | 0.42 kg (NR)             |         |

a. mean; b. values derived from graph; c. median; d. as-treated analysis; e. n at baseline (n at time-point not reported).

NA: not applicable; ND: not done; NR: not reported.

Antiretrovirals: 3TC: lamivudine; ABC: abacavir; ATV: atazanavir; ATVr: ritonavir-boosted atazanavir; AZT: zidovudine; D4T: stavudine; DDI: didanosine; EFV: efavirenz; FTC: emtricitabine; NFV: nelfinavir; TDF: tenofovir.

doi:10.1371/journal.pone.0063623.t004

**Table 5.** Change from baseline in limb fat (LF) on DEXA scan and subcutaneous adipose tissue (SAT) on CT scan: PI versus PI.

| Study | Measure          | Arm             | Week 48 (n)               | p value              | Week 96 (n) | p value |
|-------|------------------|-----------------|---------------------------|----------------------|-------------|---------|
| [15]  | LF <sup>a</sup>  | ATVr+D4T+3TC    | 2% (72)                   | NR                   | -9% (55)    | >0.05   |
|       |                  | ATV+D4T+3TC     | -3% (89)                  |                      | -17% (67)   |         |
|       | SAT <sup>a</sup> | ATVr+D4T+3TC    | 12% (68)                  | NR                   | 8% (56)     | >0.05   |
|       |                  | ATV+D4T+3TC     | 12% (85)                  |                      | 2% (62)     |         |
| [17]  | LF <sup>b</sup>  | TPVr100+TDF+3TC | 1.4% (46)                 | 0.02 vs LPVr+TDF+3TC | ND          | NA      |
|       |                  | TPVr200+TDF+3TC | 1.6% (48)                 | 0.14 vs LPVr+TDF+3TC | ND          | NA      |
|       |                  | LPVr+TDF+3TC    | 2.8% (45)                 |                      | ND          | NA      |
|       | SAT <sup>b</sup> | TPVr100+TDF+3TC | -2.1 cm <sup>2</sup> (46) | 0.03 vs LPVr+TDF+3TC | ND          | NA      |
|       |                  | TPVr200+TDF+3TC | 4.2 cm <sup>2</sup> (48)  | 0.13 vs LPVr+TDF+3TC | ND          | NA      |
|       |                  | LPVr+TDF+3TC    | 17.6 cm <sup>2</sup> (45) |                      | ND          | NA      |

a. mean; b. median.

NA: not applicable; ND: not done; NR: not reported.

Antiretrovirals: 3TC: lamivudine; ATV: atazanavir; ATVr: ritonavir-boosted atazanavir; D4T: stavudine; LPVr: ritonavir-boosted lopinavir; TDF: tenofovir; TPVr100: tipranavir/ritonavir 500/100 mg twice a day; TPVr200: tipranavir/ritonavir 500/200 mg twice a day.

doi:10.1371/journal.pone.0063623.t005

**Table 6.** Change from baseline in limb fat (LF) on DEXA scan and subcutaneous adipose tissue (SAT) on CT scan: raltegravir versus efavirenz.

| Study | Measure         | Arm         | Week 48 (n) | p value           | Week 96 (n) | p value           |
|-------|-----------------|-------------|-------------|-------------------|-------------|-------------------|
| [10]  | LF <sup>a</sup> | RAL+TDF+FTC | 18.1% (40)  | 0.95 <sup>b</sup> | 18.2% (37)  | 0.88 <sup>b</sup> |
|       |                 | EFV+TDF+FTC | 17.7% (46)  |                   | 17.0% (38)  |                   |

a. mean; b. p value calculated by authors of this review.

Antiretrovirals: EFV: efavirenz; FTC: emtricitabine; RAL: raltegravir; TDF: tenofovir.

doi:10.1371/journal.pone.0063623.t006

databases identified 3031 potential abstracts. We identified a further 67 articles through conference databases or other sources. After removing duplicate records, we screened 3042 abstracts and excluded 2966 as they did not meet our inclusion criteria. We retrieved and assessed the full text articles for the remaining 76, and excluded 49 that did not meet our inclusion criteria (see Figure 1 and Table S1). We assessed two articles that were published in Spanish through means of a translator. We included the full text articles for five studies that we identified through conference abstracts.

### Characteristics of included studies

Fat distribution measures were done in all participants for 15 studies: one cohort study [8]; nine randomised controlled trials comparing antiretroviral regimens [4,12,13,15,16,18,19,23,32]; and five switching studies [25,27,29–31]. They were done in a subset of participants only in the remaining 12 studies [3,9–11,14,17,21,22,24,26,28,33]. The characteristics of the included

**Table 7.** Proportion of patients with peripheral lipodystrophy on DEXA scan: NRTI-containing regimens versus NRTI-sparing regimens.

| Study | Definition      | Arm                          | Week 48 (n) | p value                                                                     | Week 96 (n) | p value                |
|-------|-----------------|------------------------------|-------------|-----------------------------------------------------------------------------|-------------|------------------------|
| [9]   | >20% loss of LF | LPVr+AZT+3TC                 | 27.3% (22)  | 0.018                                                                       | ND          | NA                     |
|       |                 | LPVr monotherapy             | 4.9% (41)   |                                                                             | ND          |                        |
|       |                 |                              |             | OR <sup>a</sup> LPVr+AZT+3TC vs LPVr monotherapy 7.06. 95% CI 1.11 to 78.69 |             |                        |
| [13]  | ≥20% loss of LF | EFV+3TC+(TDF or AZT or D4T)  | 21% (188)   | NR                                                                          | 32% (171)   | <0.001 vs NRTI-sparing |
|       |                 | LPVr+3TC+(TDF or AZT or D4T) | 10% (191)   |                                                                             | 17% (166)   | 0.023 vs NRTI-sparing  |
|       |                 | EFV+LPVr (NRTI-sparing)      | 7% (197)    |                                                                             | 9% (173)    |                        |
| [11]  | >20% loss of LF | DRVr+ continue 2NRTIs        | 10.8% (74)  | 0.035                                                                       | ND          | NA                     |
|       |                 | DRVr monotherapy             | 1.5% (67)   |                                                                             | ND          | NA                     |

a. adjusted for age and sex.

LF: limb fat; NA: not applicable; ND: not done; NR: not reported; OR: odds ratio.

Antiretrovirals: 3TC: lamivudine; AZT: zidovudine; D4T: stavudine; DRVr: ritonavir-boosted darunavir; EFV: efavirenz; LPVr: ritonavir-boosted lopinavir; TDF: tenofovir.

doi:10.1371/journal.pone.0063623.t007

**Table 8.** Proportion of patients with peripheral lipodystrophy on DEXA scan: PI versus NNRTI.

| Study | Definition      | Arm                                           | Week 48 (n) | p value | Week 96 (n)                                           | p value |
|-------|-----------------|-----------------------------------------------|-------------|---------|-------------------------------------------------------|---------|
| [13]  | ≥20% loss of LF | LPVr+3TC+(TDF or AZT or D4T)                  | 10% (191)   | NR      | 17% (166)                                             | 0.003   |
|       |                 | EFV+3TC+(TDF or AZT or D4T)                   | 21% (188)   |         | 32% (171)                                             |         |
|       |                 |                                               |             |         | OR <sup>a</sup> EFV vs LPVr 2.63. 95% CI 1.49 to 4.64 | <0.001  |
| [19]  | >20% loss of LF | LPVr+AZT+3TC or LPVr monotherapy <sup>b</sup> | ND          | NA      | 5% (74)                                               | <0.001  |
|       |                 | EFV+AZT+3TC                                   | ND          |         | 34% (32)                                              |         |
| [33]  | >10% loss of LF | NFV+(AZT+3TC or DDI+D4T)                      | NR          | NR      | ND                                                    | NA      |
|       |                 | EFV+(AZT+3TC or DDI+D4T)                      | NR          |         |                                                       |         |
|       |                 |                                               |             |         | OR <sup>c</sup> NFV vs EFV NR 0.06                    |         |

a. adjusted for NNRTI arm, race, sex, age, baseline extremity fat and baseline CD4 count; b. if virologically suppressed for 3 months; c. adjusted for NNRTI assignment, age, sex, race, and baseline BMI, HIV RNA and CD4 count.

LF: limb fat; NA: not applicable; ND: not done; NR: not reported; OR: odds ratio.

Antiretrovirals: 3TC: lamivudine; AZT: zidovudine; D4T: stavudine; DDI: didanosine; EFV: efavirenz; LPVr: ritonavir-boosted lopinavir; NFV: nelfinavir; TDF: tenofovir.

doi:10.1371/journal.pone.0063623.t008

**Table 9.** Proportion of patients with peripheral lipodystrophy on DEXA scan: NRTI versus NNRTI.

| Study | Definition      | Arm                  | Week 48 (n) | p value | Week 96 (n)                                               | p value |
|-------|-----------------|----------------------|-------------|---------|-----------------------------------------------------------|---------|
| [33]  | >10% loss of LF | DDI+D4T+(EFV or NFV) | NR          | 0.02    | ND                                                        | NA      |
|       |                 | AZT+3TC+(EFV or NFV) | NR          |         |                                                           |         |
|       |                 |                      |             |         | OR <sup>a</sup> DDI+D4T vs AZT+3TC 3.3. 95% CI 1.2 to 8.6 |         |

a. adjusted for age, sex, race, and baseline BMI, HIV RNA and CD4 count.

LF: limb fat; NA: not applicable; ND: not done; NR: not reported; OR: odds ratio.

Antiretrovirals: 3TC: lamivudine; AZT: zidovudine; D4T: stavudine; DDI: didanosine; EFV: efavirenz; NFV: nelfinavir.

doi:10.1371/journal.pone.0063623.t009

studies are summarised in Table 1, and risk of bias assessment in Table S2.

## Participants

Twelve randomised controlled trials enrolled antiretroviral-naïve participants [3,9,10,12,13,15,17–19,22,24,33]. The cohort study [8], seven randomised controlled trials [4,11,14,16,21,23,32], and all the switching studies enrolled antiretroviral-experienced participants. The cohort study enrolled participants both with and without lipodystrophy. Two randomised controlled trials enrolled only participants with clinical or self-reported features of lipodystrophy [23,32]; and two enrolled

participants both with and without lipodystrophy [14,21]. Three switching studies enrolled only participants with clinical or self-reported lipodystrophy [29–31]; and one enrolled participants with features of abdominal fat accumulation, defined as a waist-to-hip ratio of >0.9, with a waist circumference >88.2 or >75.3 cm in men and women respectively [25]. For the remaining studies it was not reported whether or not participants had features of lipodystrophy at baseline.

**Table 10.** Proportion of patients with peripheral lipodystrophy on DEXA scan: PI versus PI.

| Study | Definition      | Arm           | Week 48 (n) | p value | Week 96 (n) | p value |
|-------|-----------------|---------------|-------------|---------|-------------|---------|
| [15]  | ≥20% loss of LF | ATVr+D4T +3TC | 21% (72)    | NR      | 29% (55)    | <0.05   |
|       |                 | ATV+D4T +3TC  | 30% (89)    |         | 49% (67)    |         |

LF: limb fat; NR: not reported.

Antiretrovirals: 3TC: lamivudine; ATV: atazanavir; ATVr: ritonavir-boosted atazanavir; D4T: stavudine.

doi:10.1371/journal.pone.0063623.t010

**Table 11.** Proportion of patients with peripheral lipodystrophy on DEXA scan: raltegravir versus efavirenz.

| Study | Definition      | Arm          | Week 48 (n) | p value | Week 96 (n) | p value           |
|-------|-----------------|--------------|-------------|---------|-------------|-------------------|
| [10]  | ≥20% loss of LF | RAL+TDF +FTC | ND          | NA      | 8% (37)     | 0.62 <sup>a</sup> |
|       |                 | EFV+TDF +FTC | ND          |         | 5% (38)     |                   |

a. p value calculated by the authors of this review.

LF: limb fat; NA: not applicable; ND: not done.

Antiretrovirals: EFV: efavirenz; FTC: emtricitabine; RAL: raltegravir; TDF: tenofovir.

doi:10.1371/journal.pone.0063623.t011

**Table 12.** Change from baseline in trunk fat (TF) on DEXA scan, and visceral adipose tissue (VAT) on CT scan: NRTI-containing regimens versus NRTI-sparing regimens.

| Study | Measure          | Arm                                                      | Week 48 (n)                                         | p value | Week 96 (n)                                          | p value |
|-------|------------------|----------------------------------------------------------|-----------------------------------------------------|---------|------------------------------------------------------|---------|
| [9]   | TF <sup>a</sup>  | LPVr+AZT+3TC                                             | -211 g (22)                                         | 0.665   | 346 g (5)                                            | >0.05   |
|       |                  | LPVr monotherapy                                         | -579 g (41)                                         |         | -859 g (8)                                           |         |
| [4]   | TF <sup>a</sup>  | Percentage of body fat, 0 & 48 wks: <sup>b</sup>         |                                                     | NR      | ND                                                   | NA      |
|       |                  | LPVr+ continue 2NRTIs                                    | 20.6; 22.6 (33 <sup>c</sup> )                       |         |                                                      |         |
|       |                  | NVP+LPVr                                                 | 22.5; 24.0 (33 <sup>c</sup> )                       |         | ND                                                   |         |
| [12]  | VAT <sup>d</sup> | Mean (95% CI) cm <sup>2</sup> , 0 & 48 wks: <sup>e</sup> |                                                     | NR      | Mean (95% CI) cm <sup>2</sup> , 96 wks: <sup>e</sup> |         |
|       |                  | AZT+3TC+LPVr                                             | 100 (88 to 112); 104 (90 to 118) (22 <sup>c</sup> ) |         | 122 (108 to 135)                                     | NR      |
|       |                  | NVP+LPVr                                                 | 100 (89 to 111); 109 (96 to 122) (26 <sup>c</sup> ) |         | 111 (98 to 124)                                      |         |
| [32]  | VAT <sup>a</sup> | ABC+continue other ARVs                                  | -15% (43)                                           | 0.1     | ND                                                   | NA      |
|       |                  | LPVr+NVP                                                 | -4% (47)                                            |         | ND                                                   |         |
| [21]  | TF <sup>a</sup>  | EFV+2NRTIs <sup>f</sup>                                  | 133 g <sup>g</sup> (25)                             | >0.05   | -583 g <sup>g</sup> (25)                             | >0.05   |
|       |                  | LPVr+EFV                                                 | -170 g <sup>g</sup> (22)                            |         | -206 g <sup>g</sup> (22)                             |         |
| [11]  | TF <sup>a</sup>  | DRVr+ continue 2NRTIs                                    | 5.9% (74)                                           | >0.05   | ND                                                   | NA      |
|       |                  | DRVr monotherapy                                         | 7.6% (67)                                           |         | ND                                                   |         |

a. median; b. absolute values at each time-point (change from baseline not reported); c. n at baseline (n at time-point not stated); d. mean; e. means (corrected for differences in baseline values) and 95% confidence intervals (calculated by the authors of this review) at each time-point (change from baseline not reported); f. DDI+3TC or DDI+AZT or AZT+3TC or D4T+3TC or DDI+D4T; g. values derived from graph.

NA: not applicable; ND: not done; NR: not reported.

Antiretrovirals: 3TC: lamivudine; ABC: abacavir; AZT: zidovudine; D4T: stavudine; DDI: didanosine; DRVr: ritonavir-boosted darunavir; EFV: efavirenz; LPVr: ritonavir-boosted lopinavir; NVP: nevirapine.

doi:10.1371/journal.pone.0063623.t012

## Interventions

All included studies involved a comparison of different antiretroviral regimens, with the exception of the cohort study that compared HIV-infected people with people who were known or presumed to be HIV-uninfected [8]. Eight randomised controlled trials [4,9,11–13,18,21,32], and two switching studies

[29,32] evaluated NRTI-sparing regimens; four randomised controlled trials [3,19,24,33], and one switching study [31] evaluated protease inhibitor (PI) versus non-nucleoside reverse transcriptase inhibitor (NNRTI) regimens; six randomised controlled trials [3,14,16,22,23,33], and five switching studies [27,28,30,32,34] evaluated NRTI versus NRTI regimens; two

**Table 13.** Change from baseline in trunk fat (TF) on DEXA scan, and visceral adipose tissue (VAT) on CT scan: PI versus NNRTI.

| Study   | Measure           | Arm                               | Week 48 (n)                                                     | p value | Week 96 (n)                                                    | p value |
|---------|-------------------|-----------------------------------|-----------------------------------------------------------------|---------|----------------------------------------------------------------|---------|
| [3]     | TF <sup>a</sup>   | ATVr+(ABC+3TC or TDF+FTC)         | 26.1% <sup>b</sup> (105)                                        | NR      | 36.5% (94)                                                     | 0.028   |
|         |                   | EFV+(ABC+3TC or TDF+FTC)          | 20.4% <sup>b</sup> (112)                                        |         | 21.1% (109)                                                    |         |
|         | VAT               | ATVr+(ABC+3TC or TDF+FTC)         | NR                                                              | NA      | LR coefficient <sup>c</sup> (ATVr vs EFV) 11.0 cm <sup>2</sup> | 0.20    |
|         |                   | EFV+(ABC+3TC or TDF+FTC)          | NR                                                              |         | 95% CI -5.9 to 27.9                                            |         |
| [19]    | TF <sup>d</sup>   | LPVr+AZT+3TC or LPVr <sup>e</sup> | 6.9% (NR)                                                       | NR      | 13.8% <sup>b</sup> (74)                                        | >0.05   |
|         |                   | EFV+AZT+3TC                       | 15.2% (NR)                                                      |         | 14.6% <sup>b</sup> (32)                                        |         |
| [24]    | VAT <sup>a</sup>  | ATV+AZT+3TC                       | 15.3 cm <sup>2</sup> (62). 95% CI for difference: -10.4 to 12.6 | NR      | ND                                                             | NA      |
|         |                   | EFV+AZT+3TC                       | 14.1 cm <sup>2</sup> (46)                                       |         | ND                                                             |         |
| [20,33] | TF <sup>d,f</sup> | NFV+(AZT+3TC or DDI+D4T)          | 8.3% <sup>b</sup> (23)                                          | NR      | -6.8% <sup>b</sup> (11)                                        | NR      |
|         |                   | EFV+(AZT+3TC or DDI+D4T)          | 14.8% <sup>b</sup> (26)                                         |         | 32.6% <sup>b</sup> (16)                                        |         |

a. mean; b. values derived from graph; c. adjusted for treatment allocation, sex, age, race, and baseline HIV RNA, CD4 count and BMI; d. median; e. LPVr monotherapy if virologically suppressed for 3 months; f. as treated analysis.

LR: linear regression; NA: not applicable; ND: not done; NR: not reported.

Antiretrovirals: 3TC: lamivudine; ATV: atazanavir; ATVr: ritonavir-boosted atazanavir; AZT: zidovudine; D4T: stavudine; DDI: didanosine; EFV: efavirenz; FTC: emtricitabine; LPVr: ritonavir-boosted lopinavir; NFV: nelfinavir; TDF: tenofovir.

doi:10.1371/journal.pone.0063623.t013



**Table 14.** Change from baseline in trunk fat (TF) on DEXA scan, and visceral adipose tissue (VAT) on CT scan: NRTI versus NRTI.

| Study   | Measure           | Arm                                    | Week 48 (n)              | p value | Week 96 (n)                                                           | p value |
|---------|-------------------|----------------------------------------|--------------------------|---------|-----------------------------------------------------------------------|---------|
| [3]     | TF <sup>a</sup>   | ABC+3TC+(ATVr or EFV)                  | 24.9% <sup>b</sup> (107) | NR      | 29.4% <sup>b</sup> (102)                                              | 0.76    |
|         |                   | TDF+FTC+(ATVr or EFV)                  | 21.6% <sup>b</sup> (110) |         | 27.3% <sup>b</sup> (101)                                              |         |
|         | VAT               | ABC+3TC+(ATVr or EFV)                  | ND                       | NA      | LR coefficient <sup>c</sup> (ABC+3TC vs TDF+FTC) −5.3 cm <sup>2</sup> | 0.52    |
|         |                   | TDF+FTC+(ATVr or EFV)                  | ND                       |         | 95% CI −21.5 to 11.0                                                  |         |
| [22]    | TF <sup>a</sup>   | ABC+3TC+EFV                            | ND                       | NA      | 1225 g (25)                                                           | 0.58    |
|         |                   | D4T+3TC+EFV                            | ND                       |         | 996 g (32)                                                            |         |
| [23]    | TF <sup>a</sup>   | Switch AZT/D4T to ABC+cont. other ARVs | 618 g (44)               | 0.97    | ND                                                                    | NA      |
|         |                   | Switch AZT/D4T to TDF+cont. other ARVs | 607 g (49)               |         | ND                                                                    |         |
|         | VAT <sup>a</sup>  | Switch AZT/D4T to ABC+cont. other ARVs | 2 cm <sup>2</sup> (44)   | 0.49    | ND                                                                    | NA      |
|         |                   | Switch AZT/D4T to TDF+cont. other ARVs | 6.8 cm <sup>2</sup> (49) |         | ND                                                                    |         |
| [20,33] | TF <sup>d,e</sup> | DDI+D4T+(EFV or NFV)                   | 9.8% <sup>b</sup> (42)   | NR      | −0.7% <sup>b</sup> (22)                                               | NR      |
|         |                   | AZT+3TC+(EFV or NFV)                   | 9.1% <sup>b</sup> (39)   |         | 13.6% <sup>b</sup> (24)                                               |         |

a. mean; b. values derived from graph; c. adjusted for treatment allocation, sex, age, race, and baseline HIV RNA, CD4 count and BMI; d. median; e. as treated analysis. LR: linear regression; NA: not applicable; ND: not done; NR: not reported.

Antiretrovirals: 3TC: lamivudine; ABC: abacavir; ATVr: ritonavir-boosted atazanavir; AZT: zidovudine; D4T: stavudine; DDI: didanosine; EFV: efavirenz; FTC: emtricitabine; NFV: nelfinavir; TDF: tenofovir.

doi:10.1371/journal.pone.0063623.t014

randomised controlled trials [15,17], and one switching study [25] evaluated PI versus PI regimens; and one randomised controlled trial [10], and one switching study [26] evaluated other antiretroviral categories.

## Outcomes

An objective measure of fat distribution was the primary study endpoint in 15 studies [3,8,12,13,17,18,21,23–27,29,30,32]. In the remaining studies, measures of fat distribution were secondary endpoints.

**HIV-infected patients compared with healthy controls.** The FRAM2 study compared fat distribution in HIV-infected patients with healthy controls, using MRI at two time-points separated by about five years [8]. The control participants were recruited from the Visceral Fat and Metabolic Rate in Young Adults sub-study of the Coronary Artery Risk

Development in Young Adults study. They were selected as they had previous experience of fat distribution investigations, and had a similar age and ethnic distribution to most HIV-infected patients in the United States [35]. Although the analyses included HIV-infected patients who had never been on ART (11.8% at baseline and 5.7% at year 5), we included the study as only a small minority were not on ART. Sub-group analyses by ART status were not done.

There was clear evidence of fat loss in HIV-infected people, 53% of whom had lipoatrophy (defined as leg SAT below the 10<sup>th</sup> percentile of controls) after five years of observation. Longer duration of stavudine use was associated with less leg SAT. After five years there was significantly less SAT at all sites in HIV-infected men, but only in the limbs in HIV-infected women. Multivariable analysis showed that increase in SAT over five years was less in HIV-infected people at all sites except the lower trunk.

**Table 15.** Change from baseline in trunk fat (TF) on DEXA scan, and visceral adipose tissue (VAT) on CT scan: PI versus PI.

| Study | Measure          | Arm             | Week 48 (n)             | p value               | Week 96 (n) | p value |
|-------|------------------|-----------------|-------------------------|-----------------------|-------------|---------|
| [15]  | TF <sup>a</sup>  | ATVr+D4T+3TC    | 12% (72)                | NR                    | 16% (55)    | >0.05   |
|       |                  | ATV+D4T+3TC     | 15% (89)                |                       | 14% (67)    |         |
|       | VAT <sup>a</sup> | ATVr+D4T+3TC    | 28% (68)                | NR                    | 33% (56)    | >0.05   |
|       |                  | ATV+D4T+3TC     | 34% (85)                |                       | 32% (62)    |         |
| [17]  | TF <sup>b</sup>  | TPVr100+TDF+3TC | −0.8% (46)              | 0.005 vs LPVr+TDF+3TC | ND          | NA      |
|       |                  | TPVr200+TDF+3TC | −0.7% (48)              | 0.02 vs LPVr+TDF+3TC  | ND          |         |
|       |                  | LPVr+TDF+3TC    | 2.1% (45)               |                       | ND          |         |
|       | VAT <sup>b</sup> | TPVr100+TDF+3TC | −6 cm <sup>2</sup> (46) | 0.4 vs LPVr+TDF+3TC   | ND          | NA      |
|       |                  | TPVr200+TDF+3TC | −9 cm <sup>2</sup> (48) | 0.04 vs LPVr+TDF+3TC  | ND          |         |
|       |                  | LPVr+TDF+3TC    | −3 cm <sup>2</sup> (45) |                       | ND          |         |

a. mean; b. median.

NA: not applicable; ND: not done; NR: not reported.

Antiretrovirals: 3TC: lamivudine; ATV: atazanavir; ATVr: ritonavir-boosted atazanavir; D4T: stavudine; LPVr: ritonavir-boosted lopinavir; TDF: tenofovir; TPVr100: tipranavir/ritonavir 500/100 mg twice a day; TPVr200: tipranavir/ritonavir 500/200 mg twice a day.

doi:10.1371/journal.pone.0063623.t015

**Table 16.** Change from baseline in trunk fat (TF) on DEXA scan, and visceral adipose tissue (VAT) on CT scan: raltegravir versus efavirenz.

| Study | Measure         | Arm          | Week 48 (n) | p value           | Week 96 (n) | p value           |
|-------|-----------------|--------------|-------------|-------------------|-------------|-------------------|
| [10]  | TF <sup>a</sup> | RAL+TDF +FTC | 18.9% (40)  | 0.63 <sup>b</sup> | 21.6% (37)  | 0.71 <sup>b</sup> |
|       |                 | EFV+TDF +FTC | 22.6% (46)  |                   | 25.5% (38)  |                   |

a. mean; b. p value calculated by authors of this review.

Antiretrovirals: EFV: efavirenz; FTC: emtricitabine; RAL: raltegravir; TDF: tenofovir.

doi:10.1371/journal.pone.0063623.t016

In general, participants who received NRTI-sparing regimens gained more (or lost less) SAT or limb fat over time than those on NRTI-containing regimens. However one study that compared an abacavir-containing regimen with an NRTI-sparing regimen found no significant differences in change in subcutaneous thigh fat or SAT [32]. Participants who received PI-containing regimens also gained more (or lost less) SAT or limb fat over time than those on efavirenz-based regimens [3,13,19,24,33]. The incidence of peripheral lipoatrophy (defined as  $\geq 20\%$  loss of limb fat) was significantly lower in participants on NRTI-sparing regimens compared with those on NRTI-containing regimens, and in those on PI-containing regimens compared with those on EFV-based regimens [9,11,13,19].

There were no significant differences in average gains in SAT or limb fat over time in the four studies that compared abacavir- with tenofovir-based regimens [3,14,16,23]. One study found that

**Table 17.** Switching studies: change from baseline in subcutaneous thigh fat (STF) and subcutaneous adipose tissue (SAT) on CT scan: NRTI-containing regimens versus NRTI-sparing regimens.

| Study | Measure          | Arm                     | Week 24 (n) | p value | Week 48 (n)             | p value | Week 96 (n)              | p value |
|-------|------------------|-------------------------|-------------|---------|-------------------------|---------|--------------------------|---------|
| [32]  | STF <sup>a</sup> | Cont AZT or D4T regimen | -3% (24)    | NR      | ND                      | NA      | ND                       | NA      |
|       |                  | Switch to LPVr+NVP      | 8% (40)     |         | ND                      |         | ND                       |         |
| [29]  | STF <sup>b</sup> | Cont NRTI regimen       | ND          | NA      | 0 cm <sup>3</sup> (35)  | 0.004   | 11 cm <sup>3</sup> (25)  | 0.001   |
|       |                  | Switch to PI+NNRTI      | ND          |         | 42 cm <sup>3</sup> (41) |         | 120 cm <sup>3</sup> (28) |         |
|       | SAT <sup>b</sup> | Cont NRTI regimen       | ND          | NA      | 1 cm <sup>3</sup> (35)  | 0.004   | 14 cm <sup>3</sup> (23)  | 0.088   |
|       |                  | Switch to PI+NNRTI      | ND          |         | 22 cm <sup>3</sup> (39) |         | 31 cm <sup>3</sup> (30)  |         |

a. median; b. mean.

NA: not applicable; ND: not done; NR: not reported.

Antiretrovirals: AZT: zidovudine; D4T: stavudine; LPVr: ritonavir-boosted lopinavir; NVP: nevirapine.

doi:10.1371/journal.pone.0063623.t017

By contrast, there was no evidence of regional fat accumulation in HIV-infected people. After five years the amount of trunk SAT and VAT was similar in HIV-infected and control women, while HIV-infected men had less fat at all sites than control men. The gains in VAT over five years were similar in HIV-infected people and controls.

**Fat loss: changes in limb fat and SAT with different antiretroviral regimens.** The changes from baseline in limb fat and SAT are summarised in Tables 2, 3, 4, 5, and 6, and the incidences of peripheral lipoatrophy (defined as  $\geq 20\%$  loss in limb fat) are summarised in Tables 7, 8, 9, 10, and 11.

participants who received an abacavir-containing regimen gained limb fat over time, in contrast to participants who received a stavudine-containing regimen who lost limb fat over time (gain of 913 g versus loss of 1578 g,  $p < 0.001$ ) [22]. Another study found that participants who received a zidovudine-lamivudine-containing regimen gained limb fat over time, in contrast to participants who received a stavudine-didanosine-containing regimen who lost limb fat over time (gain of 1.7% versus loss of 26.4%, p value not reported) [33].

Unboosted atazanavir was associated with significant reduction in limb fat at 96 weeks, while there was no significant change in

**Table 18.** Switching studies: change from baseline in limb fat (LF) on DEXA scan: PI versus NNRTI.

| Study | Measure           | Arm                   | Week 24 (n) | p value | Week 48 (n)           | p value                                                                        | Week 96 (n) | p value |
|-------|-------------------|-----------------------|-------------|---------|-----------------------|--------------------------------------------------------------------------------|-------------|---------|
| [31]  | LF <sup>a,b</sup> | Cont PI+ 2NRTIs       | ND          | NA      | NR (54 <sup>c</sup> ) | Mean (95% CI) 0 & 48 wks (kg): <sup>d</sup> 1.5 (1.3 to 1.8); 1.3 (1.1 to 1.6) | ND          | NA      |
|       |                   | Switch to NVP+DDI+D4T | ND          |         | NR (52 <sup>c</sup> ) | 1.2 (1.1 to 1.4); 1.2 (1.1 to 1.4)                                             | ND          |         |

a. mean; b. leg fat; c. n at baseline (n at time-point not stated); d. means and 95% confidence intervals (calculated by the authors of this review) at each time-point (change from baseline not reported).

NA: not applicable; ND: not done; NR: not reported.

Antiretrovirals: D4T: stavudine; DDI: didanosine; NVP: nevirapine.

doi:10.1371/journal.pone.0063623.t018

**Table 19.** Switching studies: change from baseline in limb fat (LF) on DEXA scan, and subcutaneous thigh fat (STF) and subcutaneous adipose tissue (SAT) on CT scan: NRTI versus NRTI.

| Study             | Measure                 | Arm                       | Week 24 (n)               | p value                | Week 48 (n)                                     | p value | Week 96 | p value |
|-------------------|-------------------------|---------------------------|---------------------------|------------------------|-------------------------------------------------|---------|---------|---------|
| [28]              | LF <sup>a</sup>         | Cont AZT+3TC+EFV          | ND                        | NA                     | -187 g (36). 95% CI for difference: 57 to 837 g | 0.024   | ND      | NA      |
|                   |                         | Switch TDF+FTC+EFV        | ND                        |                        | 261 g (38)                                      |         | ND      |         |
| [32]              | STF <sup>b</sup>        | Cont AZT or D4T regimen   | -3% (24)                  | NR                     | ND                                              | NA      | ND      | NA      |
|                   |                         | Switch AZT/D4T to ABC     | 0% (37)                   |                        | ND                                              |         | ND      |         |
| [30]              | LF <sup>a</sup>         | Cont AZT or D4T regimen   | 0.08 kg (56)              | 0.02                   | ND                                              | NA      | ND      | NA      |
|                   |                         | Switch AZT/D4T to ABC     | 0.39 kg (50)              |                        | ND                                              |         | ND      |         |
|                   | STF <sup>a,c</sup>      | Cont AZT or D4T regimen   | -1.2 cm <sup>2</sup> (56) | 0.01                   | ND                                              | NA      | ND      | NA      |
|                   |                         | Switch AZT/D4T to ABC     | 3.3 cm <sup>2</sup> (50)  |                        | ND                                              |         | ND      |         |
| SAT <sup>a</sup>  | Cont AZT or D4T regimen | -1.2 cm <sup>2</sup> (56) | 0.001                     | ND                     | NA                                              | ND      | NA      |         |
|                   | Switch AZT/D4T to ABC   | 13.9 cm <sup>2</sup> (50) |                           | ND                     |                                                 | ND      |         |         |
| [27]              | SAT <sup>b</sup>        | Cont AZT+3TC              | -2.7% <sup>d</sup> (NR)   | NR                     | -2.7% <sup>d</sup> (59)                         | 0.03    | ND      | NA      |
|                   |                         | Switch to TDF+FTC         | 2.1% <sup>d</sup> (NR)    |                        | 1.6% <sup>d</sup> (66)                          |         | ND      |         |
|                   | LF <sup>b</sup>         | Cont AZT+3TC              | 3.2% <sup>d</sup> (NR)    | NR                     | 1.1% <sup>d</sup> (59)                          | 0.5     | ND      | NA      |
| Switch to TDF+FTC |                         | 3.9% <sup>d</sup> (NR)    |                           | 5.2% <sup>d</sup> (66) |                                                 | ND      |         |         |

a. mean; b. median; c. right thigh; d. values derived from graph.

NA: not applicable; ND: not done; NR: not reported.

Antiretrovirals: 3TC: lamivudine; ABC: abacavir; AZT: zidovudine; D4T: stavudine; EFV: efavirenz; FTC: emtricitabine; TDF: tenofovir.

doi:10.1371/journal.pone.0063623.t019

**Table 20.** Switching studies: change from baseline in limb fat (LF) on DEXA scan and subcutaneous adipose tissue (SAT) on CT scan: PI versus PI.

| Study | Measure          | Arm                  | Week 24 (n) | p value | Week 48 (n) | p value | Week 96 (n) | p value |
|-------|------------------|----------------------|-------------|---------|-------------|---------|-------------|---------|
| [25]  | LF <sup>a</sup>  | Continue Plr +2NRTIs | ND          | NA      | -3.6% (54)  | 0.15    | -6.1% (54)  | 0.17    |
|       |                  | Switch Plr to ATVr   | ND          |         | 0.9% (112)  |         | -0.8% (112) |         |
|       | SAT <sup>a</sup> | Continue Plr +2NRTIs | ND          | NA      | -5.9% (59)  | 0.16    | -9.7% (59)  | 0.6     |
|       |                  | Switch Plr to ATVr   | ND          |         | -2.1% (108) |         | -3.5% (108) |         |

a. mean.

NA: not applicable; ND: not done.

Antiretrovirals: ATVr: ritonavir-boosted atazanavir; Plr: ritonavir-boosted PI.

doi:10.1371/journal.pone.0063623.t020

**Table 21.** Switching studies: change from baseline in limb fat (LF) on DEXA scan and subcutaneous adipose tissue (SAT) on CT scan: PI versus raltegravir.

| Study | Measure          | Arm              | Week 24 (n) | p value | Week 48 (n) | p value | Week 96 (n) | p value |
|-------|------------------|------------------|-------------|---------|-------------|---------|-------------|---------|
| [26]  | LF <sup>a</sup>  | Cont PI regimen  | ND          | NA      | 171 g (35)  | 0.791   | ND          | NA      |
|       |                  | Switch PI to RAL | ND          |         | 32 g (39)   |         | ND          |         |
|       | SAT <sup>a</sup> | Cont PI regimen  | ND          | NA      | 3.6% (35)   | 0.496   | ND          | NA      |
|       |                  | Switch PI to RAL | ND          |         | -1.9% (39)  |         | ND          |         |

a. median.

NA: not applicable; ND: not done; RAL: raltegravir.

doi:10.1371/journal.pone.0063623.t021

**Table 22.** Switching studies: change from baseline in visceral adipose tissue (VAT) on CT scan: NRTI-containing versus NRTI-sparing regimens.

| Study | Measure          | Arm                | Week 24 (n) | p value | Week 48 (n)            | p value | Week 96 (n)             | p value |
|-------|------------------|--------------------|-------------|---------|------------------------|---------|-------------------------|---------|
| [29]  | VAT <sup>a</sup> | Cont NRTI regimen  | ND          | NA      | 5 cm <sup>3</sup> (35) | 0.987   | 17 cm <sup>3</sup> (23) | 0.566   |
|       |                  | Switch to PI+NNRTI | ND          |         | 7 cm <sup>3</sup> (39) |         | 6 cm <sup>3</sup> (30)  |         |

a. mean.

NA: not applicable; ND: not done.

doi:10.1371/journal.pone.0063623.t022

limb fat in the ritonavir-boosted atazanavir arm (both arms were on stavudine and lamivudine) [15]. The proportion of participants with  $\geq 20\%$  loss in limb fat was significantly greater in the unboosted atazanavir arm at 96 weeks [15]. However, there were no significant between-group differences in absolute change from baseline in SAT or limb fat with ritonavir-boosted versus unboosted atazanavir [15]. There were no significant between-group differences in absolute change from baseline in SAT or limb fat in a study comparing ritonavir-boosted tipranavir (at the registered dose) with ritonavir-boosted lopinavir [17].

In the one study that compared raltegravir with efavirenz, average gains in limb fat over time and the incidence of lipoatrophy were similar in both groups [10].

**Fat gain: changes in trunk fat or VAT with different antiretroviral regimens.** In general, participants randomised to different ART regimens gained similar amounts of trunk fat or VAT over time. The changes from baseline in trunk fat and VAT are summarised in Tables 12, 13, 14, 15, 16.

There were no significant between-group differences in changes from baseline in trunk fat or VAT in the six studies that compared NRTI-sparing and NRTI-containing regimens [4,9,11,12,21,32], and in the four studies that compared different NRTI-containing regimens [3,22,23,33]. Similarly, there were no significant differences in the incidences of lipohypertrophy (defined as  $>20\%$  gain in trunk fat) [9,11,19].

The results of studies that compared PIs and NNRTIs were not consistent. One study found that participants who received ritonavir-boosted atazanavir had significantly greater increases in trunk fat at week 96 than those who received efavirenz (36.5% versus 21.1% respectively,  $p = 0.028$ ) [3]. Another study found no significant changes at week 48 in VAT between those who received unboosted atazanavir compared with those who received

efavirenz (15.3 cm<sup>2</sup> versus 14.1 cm<sup>2</sup> respectively, 95% confidence interval for the difference:  $-10.4$  to  $12.6$  cm<sup>2</sup>) [24]. There were no significant between-group differences in changes from baseline in trunk fat, or in incidence of lipohypertrophy in one study that compared ritonavir-boosted lopinavir and efavirenz [19]. One study found that participants who received efavirenz gained more trunk fat over time on average than those who received nelfinavir, however it was not reported whether or not the difference was statistically significant [33].

There were no significant between-group changes from baseline in trunk fat or VAT in those who received ritonavir-boosted atazanavir compared with unboosted atazanavir in one study [15]. A study that compared ritonavir-boosted tipranavir and ritonavir-boosted lopinavir found small, but statistically significant between-group differences in changes from baseline in both trunk fat and VAT: those who received ritonavir-boosted tipranavir lost trunk fat over time, while those who received ritonavir-boosted lopinavir gained trunk fat over time [17].

In the one study that compared raltegravir with efavirenz, gains in trunk fat over time were similar in both groups [10].

**Changes in limb fat and SAT after switching antiretroviral regimens.** In general, participants who were switched away from NRTI-containing, or more specifically thymidine analogue-containing, regimens gained limb fat over time, when compared with participants who continued NRTI- or thymidine analogue-containing regimens, who generally lost limb fat [27–30,32,34].

There were no significant between-group differences in changes from baseline in limb fat or SAT in studies that switched to NNRTI- from PI-containing regimens [31], to ritonavir-boosted atazanavir from other ritonavir-boosted PI regimens [25], or to raltegravir from PI regimens [26].

**Table 23.** Switching studies: change from baseline in trunk fat (TF) on DEXA scan: PI versus NNRTI.

| Study | Measure         | Arm                    | Week 24 | p value | Week 48 (n)           | p value                                     | Week 96 | p value |
|-------|-----------------|------------------------|---------|---------|-----------------------|---------------------------------------------|---------|---------|
| [31]  |                 |                        |         |         |                       | Mean (95% CI) 0 & 48 wks (kg): <sup>c</sup> |         |         |
|       | TF <sup>a</sup> | Cont PI+ 2NRTIs        | ND      | NA      | NR (54 <sup>b</sup> ) | 7.8 (6.9 to 8.7); 8.0 (6.9 to 9.1)          | ND      | NA      |
|       |                 | Switch to NVP +DDI+D4T | ND      |         | NR (52 <sup>b</sup> ) | 6.3 (5.7 to 6.9); 5.9 (5.2 to 6.7)          | ND      |         |

a. mean; b. n at baseline (n at time-point not stated); c. means and 95% confidence intervals (calculated by the authors of this review) at each time-point (change from baseline not reported).

NA: not applicable; ND: not done; NR: not reported.

Antiretrovirals: D4T: stavudine; DDI: didanosine; NVP: nevirapine.

doi:10.1371/journal.pone.0063623.t023

**Table 24.** Switching studies: change from baseline in trunk fat (TF) on DEXA scan and visceral adipose tissue (VAT) on CT scan: NRTI versus NRTI.

| Study | Measure          | Arm                     | Week 24 (n)               | p value | Week 48 (n) | p value | Week 96 (n) | p value |
|-------|------------------|-------------------------|---------------------------|---------|-------------|---------|-------------|---------|
| [28]  | TF <sup>a</sup>  | Cont AZT+3TC+EFV        | ND                        | NA      | 358 g       | >0.05   | ND          | NA      |
|       |                  | Switch TDF+FTC+EFV      | ND                        |         | 130 g       |         | ND          |         |
| [30]  | TF <sup>a</sup>  | Cont AZT or D4T regimen | 0.8 kg (56)               | 0.31    | ND          | NA      | ND          | NA      |
|       |                  | Switch AZT/D4T to ABC   | 1.4 kg (50)               |         | ND          |         | ND          |         |
|       | VAT <sup>a</sup> | Cont AZT or D4T regimen | -1.3 cm <sup>2</sup> (56) | 0.07    | ND          | NA      | ND          | NA      |
|       |                  | Switch AZT/D4T to ABC   | 1.2 cm <sup>2</sup> (50)  |         | ND          |         | ND          |         |

a. mean.

NA: not applicable; ND: not done.

Antiretrovirals: 3TC: lamivudine; ABC: abacavir; AZT: zidovudine; D4T: stavudine; DDI: didanosine; EFV: efavirenz; TDF: tenofovir.

doi:10.1371/journal.pone.0063623.t024

Changes from baseline in limb fat, subcutaneous thigh fat and SAT are summarized in Tables 17, 18, 19, 20, and 21.

**Changes in trunk fat or VAT after switching antiretroviral regimens.** In general, participants who were switched away from NRTI-containing regimens, or from thymidine analogue-containing regimens, had similar increases in trunk fat over time to those who continued NRTI- or thymidine analogue-containing regimens [29,30].

There were no significant between-group differences in changes from baseline in trunk fat or VAT in studies that switched to NNRTI- from PI-containing regimens [31], to ritonavir-boosted atazanavir from other ritonavir-boosted PI regimens [25], or to raltegravir from PI regimens [26].

Changes from baseline in trunk fat and VAT are summarised in Tables 22, 23, 24, 25, and 26.

## Discussion

We found overwhelming evidence that lipoatrophy is an antiretroviral adverse drug reaction. Subcutaneous fat volumes are considerably lower in patients on ART than in controls,

subcutaneous fat loss progresses on ART, is associated with stavudine and zidovudine use, and partially reverses after switching to abacavir, tenofovir or an NRTI-sparing regimen. By contrast, central fat gain does not appear to be an antiretroviral adverse drug reaction. Visceral and trunk fat volume is no different in women on ART compared with control women, and is less in men on ART than in control men. Visceral fat accumulates at the same rate in patients on ART and controls. Finally, central fat gain generally occurs at similar rates in HIV-infected patients randomised to different ART regimens, is not associated with any specific antiretroviral drug or drug class, and does not reverse on switching antiretrovirals. We believe that this evidence indicates that central fat gain is a consequence of treating HIV infection, which normalizes the concentrations of inflammatory markers such as TNF- $\alpha$  (tumour necrosis factor alpha) that are known to cause wasting [36]. Lipoatrophy occurring together with central fat gain results in an unusual appearance, which may have persuaded clinicians that the fat gain is an antiretroviral adverse drug reaction. The fact that diet and exercise have been shown to improve central fat gain in patients on antiretroviral therapy

**Table 25.** Switching studies: change from baseline in trunk fat (TF) on DEXA scan and visceral adipose tissue (VAT) on CT scan: PI versus PI.

| Study | Measure          | Arm                  | Week 24 (n) | p value | Week 48 (n) | p value | Week 96 (n) | p value |
|-------|------------------|----------------------|-------------|---------|-------------|---------|-------------|---------|
| [25]  | TF <sup>a</sup>  | Continue Plr +2NRTIs | ND          | NA      | -1.8% (57)  | 0.14    | -3.6% (57)  | 0.14    |
|       |                  | Switch Plr to ATVr   | ND          |         | 2.6% (112)  |         | 1.6% (112)  |         |
|       | VAT <sup>a</sup> | Continue Plr +2NRTIs | ND          | NA      | -0.5% (59)  | 0.27    | 1.6% (59)   | 0.68    |
|       |                  | Switch Plr to ATVr   | ND          |         | 4.6% (108)  |         | 3.4% (108)  |         |

a. mean.

NA: not applicable; ND: not done.

Antiretrovirals: ATVr: ritonavir-boosted atazanavir; Plr: ritonavir-boosted PI.

doi:10.1371/journal.pone.0063623.t025

**Table 26.** Switching studies: change from baseline in trunk fat (TF) on DEXA scan and visceral adipose tissue (VAT) on CT scan: PI versus raltegravir.

| Study | Measure          | Arm              | Week 24 (n) | p value | Week 48 (n) | p value | Week 96 (n) | p value |
|-------|------------------|------------------|-------------|---------|-------------|---------|-------------|---------|
| [26]  | TF <sup>a</sup>  | Cont PI regimen  | ND          | NA      | 382 g (35)  | 0.729   | ND          | NA      |
|       |                  | Switch PI to RAL | ND          |         | -28 g (39)  |         | ND          |         |
|       | VAT <sup>a</sup> | Cont PI regimen  | ND          | NA      | 11.9% (35)  | 0.936   | ND          | NA      |
|       |                  | Switch PI to RAL | ND          |         | 12.8% (39)  |         | ND          |         |

a. median.

NA: not applicable; ND: not done; RAL: raltegravir.

doi:10.1371/journal.pone.0063623.t026

provides some support for our conclusion that it is a consequence of lifestyle [37–39].

Efavirenz is associated with a higher risk of limb fat loss than PIs when combined with NRTIs that cause fat loss. A possible explanation for this observation is that the anti-apoptotic properties of PIs partially ameliorate the loss of adipocytes by increased apoptosis that is induced by NRTIs [40]. The observation that unboosted atazanavir, which is a non-peptidomimetic PI that does not have anti-apoptotic properties, is associated with more limb fat loss than ritonavir (a peptidomimetic PI)-boosted atazanavir supports this hypothesis. Alternatively, efavirenz may increase the adipocyte toxicity of thymidine analogue NRTIs. Efavirenz has been shown to be more toxic to adipocytes and to release more inflammatory cytokines than lopinavir-ritonavir [41]. Furthermore, efavirenz also displays mitochondrial toxicity in hepatocytes [42]; although we could find no data to support this, it is possible that it has a similar effect on adipocytes. Mitochondrial toxicity is thought to be a key mechanism of thymidine analogue-induced lipodystrophy [3].

Our study has several limitations. First, many of the studies that reported objective measures of fat redistribution by ART regimen were convenience sub-studies of randomised controlled trials, therefore patients undergoing DEXA and/or CT scans were not randomised. However, fat distribution sub-studies generally reported that the characteristics of the patients undergoing imaging of fat tissue were not different from the parent trial population. Many RCTs were powered according to efficacy endpoints, and not for objective measures of fat distribution. Second, many studies reported only summary statistics and different outcome measures were reported, which prevented us from pooling data from different studies. Third, some studies did not report statistical analyses of changes in body fat distribution by

study arm. Fourth, we were unable to assess the role of older protease inhibitors (other than nelfinavir) or nevirapine in fat redistribution as no studies with those antiretrovirals fulfilled our inclusion criteria. Fifth, we found only one study that compared fat changes over time in patients on ART and HIV-infected controls that was conducted in the United States. This limits our ability to generalise findings to other populations. Finally, we cannot exclude the causative role of specific antiretrovirals in focal forms of fat gain, such as buffalo humps, as the included studies reported trunk or visceral fat changes only.

In conclusion, our systematic review supports the hypothesis that peripheral lipodystrophy, but not central fat gain, is an antiretroviral adverse drug reaction. Lipodystrophy can be avoided and at least partially reversed by avoiding thymidine analogue nucleoside reverse transcriptase inhibitors. Central fat gain appears to be a consequence of treating HIV-infection, and reflects patterns of fat gain seen in the HIV-uninfected population.

## Supporting Information

**Table S1 Excluded studies.**  
(DOCX)

**Table S2 Risk of bias.**  
(DOCX)

## Author Contributions

Conceived and designed the experiments: GM RdW KC. Performed the experiments: RdW KC GM. Analyzed the data: RdW KC. Contributed reagents/materials/analysis tools: GM RdW KC. Wrote the paper: RdW KC GM.

## References

- Carr A (2003) HIV lipodystrophy: risk factors, pathogenesis, diagnosis and management. *AIDS* 17: S141–S148.
- Grinspoon S, Carr A (2005) Cardiovascular Risk and Body-Fat Abnormalities in HIV-Infected Adults. *N Engl J Med* 352: 48–62.
- McComsey GA, Kitch D, Sax PE, Tebas P, Tierney C, et al. (2011) Peripheral and central fat changes in subjects randomized to abacavir-lamivudine or tenofovir-emtricitabine with atazanavir-ritonavir or efavirenz: ACTG Study A5224s. *Clin Infect Dis* 53: 185–196.
- Negredo E, Miro O, Rodriguez-Santiago B, Garrabou G, Estany C, et al. (2009) Improvement of mitochondrial toxicity in patients receiving a nucleoside reverse-transcriptase inhibitor-sparing strategy: results from the Multicenter Study with Nevirapine and Kaletra (MULTINEKA). *Clin Infect Dis* 49: 892–900.
- Bachetti P, Gripshover B, Grunfeld C, Heymsfield S, McCreath H, et al. (2005) Fat Distribution in Men with HIV Infection. *J Acquir Immune Defic Syndr* 40: 121–131.
- Ammassari A, Antinori A, Cozzi-Lepri A, Trotta MP, Nasti G, et al. (2002) Relationship Between HAART Adherence and Adipose Tissue Alterations. *J Acquir Immune Defic Syndr* 31: S140–S144.
- Higgins JPT, Green S, (editors) (2011) *Cochrane Handbook for Systematic Reviews of Interventions* Version 5.1.0 [updated March 2011]. The Cochrane Collaboration. Cochrane Handbook website. Available: [www.cochrane-handbook.org](http://www.cochrane-handbook.org). Accessed 2012 May 23.
- Grunfeld C, Saag M, Cofrancesco J Jr, Lewis CE, Kronmal R, et al. (2010) Regional adipose tissue measured by MRI over 5 years in HIV-infected and control participants indicates persistence of HIV-associated lipodystrophy. *AIDS* 24: 1717–1726.

9. Kolta S, Flandre P, Van PN, Cohen-Codar I, Valantin MA, et al. (2011) Fat tissue distribution changes in HIV-infected patients treated with lopinavir/ritonavir. Results of the MONARK trial. *Curr HIV Res* 9: 31–39.
10. Lennox JL, Dejesus E, Berger DS, Lazzarin A, Pollard RB, et al. (2010) Raltegravir versus Efavirenz regimens in treatment-naïve HIV-1-infected patients: 96-week efficacy, durability, subgroup, safety, and metabolic analyses. *J Acquir Immune Defic Syndr* 55: 39–48.
11. Valantin MA, Flandre P, Kolta S, Duvivier C, Genin MA, et al. (2010) Fat Tissue Distribution Changes in HIV-infected Patients with Viral Suppression Treated with Darunavir/ritonavir (DRV/r) monotherapy versus 2 NRTIs + DRV/r in the MONOI-ANRS 136 Randomized Trial: Results at 48 weeks. Conference on Retroviruses and Opportunistic Infections. San Francisco.
12. van Vonderen MG, van Agtmael MA, Hassink EA, Milinkovic A, Brinkman K, et al. (2009) Zidovudine/lamivudine for HIV-1 infection contributes to limb fat loss. *PLoS One* 4: e5647.
13. Haubrich RH, Riddler SA, DiRienzo AG, Komarow L, Powderly WG, et al. (2009) Metabolic outcomes in a randomized trial of nucleoside, nonnucleoside and protease inhibitor-sparing regimens for initial HIV treatment. *AIDS* 23: 1109–1118.
14. Martinez E, Arranz JA, Podzamczar D, Lonca M, Sanz J, et al. (2009) A simplification trial switching from nucleoside reverse transcriptase inhibitors to once-daily fixed-dose abacavir/lamivudine or tenofovir/emtricitabine in HIV-1-infected patients with virological suppression. *J Acquir Immune Defic Syndr* 51: 290–297.
15. McComsey G, Rightmire A, Wirtz V, Yang R, Mathew M, et al. (2009) Changes in body composition with ritonavir-boosted and unboosted atazanavir treatment in combination with Lamivudine and Stavudine: a 96-week randomized, controlled study. *Clin Infect Dis* 48: 1323–1326.
16. Martin A, Bloch M, Amin J, Baker D, Cooper DA, et al. (2009) Simplification of antiretroviral therapy with tenofovir-emtricitabine or abacavir-Lamivudine: a randomized, 96-week trial. *Clin Infect Dis* 49: 1591–1601.
17. Carr A, Ritzhaupt A, Zhang W, Zajdenverg R, Workman C, et al. (2008) Effects of boosted tipranavir and lopinavir on body composition, insulin sensitivity and adipocytokines in antiretroviral-naïve adults. *AIDS* 22: 2313–2321.
18. Duvivier C, Ghosn J, Assoumou L, Soulie C, Peytavin G, et al. (2008) Initial therapy with nucleoside reverse transcriptase inhibitor-containing regimens is more effective than with regimens that spare them with no difference in short-term fat distribution: Hippocampe-ANRS 121 Trial. *J Antimicrob Chemother* 62: 797–808.
19. Cameron DW, da Silva BA, Arribas JR, Myers RA, Bellos NC, et al. (2008) A 96-week comparison of lopinavir-ritonavir combination therapy followed by lopinavir-ritonavir monotherapy versus efavirenz combination therapy. *J Infect Dis* 198: 234–240.
20. Dube MP, Komarow L, Mulligan K, Grinspoon SK, Parker RA, et al. (2007) Long-term body fat outcomes in antiretroviral-naïve participants randomized to nelfinavir or efavirenz or both plus dual nucleosides. Dual X-ray absorptiometry results from A5005s, a substudy of Adult Clinical Trials Group 384. *J Acquir Immune Defic Syndr* 45: 508–514.
21. Tebas P, Zhang J, Yarasheski K, Evans S, Fischl MA, et al. (2007) Switching to a protease inhibitor-containing, nucleoside-sparing regimen (lopinavir/ritonavir plus efavirenz) increases limb fat but raises serum lipid levels: results of a prospective randomized trial (AIDS clinical trial group 5125s). *J Acquir Immune Defic Syndr* 45: 193–200.
22. Podzamczar D, Ferrer E, Sanchez P, Gatell JM, Crespo M, et al. (2007) Less lipodystrophy and better lipid profile with abacavir as compared to stavudine: 96-week results of a randomized study. *J Acquir Immune Defic Syndr* 44: 139–147.
23. Moyle GJ, Sabin CA, Cartledge J, Johnson M, Wilkins E, et al. (2006) A randomized comparative trial of tenofovir DF or abacavir as replacement for a thymidine analogue in persons with lipodystrophy. *AIDS* 20: 2043–2050.
24. Jemsek JG, Arathoon E, Arlotti M, Perez C, Sosa N, et al. (2006) Body fat and other metabolic effects of atazanavir and efavirenz, each administered in combination with zidovudine plus lamivudine, in antiretroviral-naïve HIV-infected patients. *Clin Infect Dis* 42: 273–280.
25. Moyle GJ, Andrade-Villanueva J, Girard PM, Antinori A, Salvato P, et al. (2012) A randomized comparative 96-week trial of boosted atazanavir versus continued boosted protease inhibitor in HIV-1 patients with abdominal adiposity. *Antivir Ther* 17: 689–700.
26. Curran A, Martinez E, Saumoy M, del Rio L, Crespo M, et al. (2012) Body composition changes after switching from protease inhibitors to raltegravir: SPIRAL-LIP substudy. *AIDS* 26: 475–481.
27. Feeney ER, Vrouenraets SME, Wit F, Brinkman K, Capel E, et al. (2011) Switching Zidovudine to Tenofovir Improves Subcutaneous Adipose Tissue Volume and mtDNA Content. Conference on Retroviruses and Opportunistic Infections. Boston.
28. Fisher M, Moyle GJ, Shahmanesh M, Orkin C, Kingston M, et al. (2009) A randomized comparative trial of continued zidovudine/lamivudine or replacement with tenofovir disoproxil fumarate/emtricitabine in efavirenz-treated HIV-1-infected individuals. *J Acquir Immune Defic Syndr* 51: 562–568.
29. Valantin MA, Lanoy E, Bentata M, Kalmykova O, Boutekdjirt A, et al. (2008) Recovery of fat following a switch to nucleoside reverse transcriptase inhibitor-sparing therapy in patients with lipodystrophy: results from the 96-week randomized ANRS 108 NoNuke Trial. *HIV Med* 9: 625–635.
30. Carr A, Workman C, Smith DE, Hoy J, Hudson J, et al. (2002) Abacavir substitution for nucleoside analogs in patients with HIV lipodystrophy: a randomized trial. *JAMA* 288: 207–215.
31. Ruiz L, Negro E, Domingo P, Paredes R, Francia E, et al. (2001) Antiretroviral treatment simplification with nevirapine in protease inhibitor-experienced patients with hiv-associated lipodystrophy: 1-year prospective follow-up of a multicenter, randomized, controlled study. *J Acquir Immune Defic Syndr* 27: 229–236.
32. Tebas P, Zhang J, Hafner R, Tashima K, Shevitz A, et al. (2009) Peripheral and visceral fat changes following a treatment switch to a non-thymidine analogue or a nucleoside-sparing regimen in HIV-infected subjects with peripheral lipodystrophy: results of ACTG A5110. *J Antimicrob Chemother* 63: 998–1005.
33. Dube MP, Parker RA, Tebas P, Grinspoon SK, Zackin RA, et al. (2005) Glucose metabolism, lipid, and body fat changes in antiretroviral-naïve subjects randomized to nelfinavir or efavirenz plus dual nucleosides. *AIDS* 19: 1807–1818.
34. Milinkovic A, Martinez E, Lopez S, de Lazzari E, Miro O, et al. (2007) The impact of reducing stavudine dose versus switching to tenofovir on plasma lipids, body composition and mitochondrial function in HIV-infected patients. *Antivir Ther* 12: 407–415.
35. Tien PC, Benson C, Zolopa AR, Sidney S, Osmond D, et al. (2006) The Study of Fat Redistribution and Metabolic Change in HIV Infection (FRAM): Methods, Design, and Sample Characteristics. *Am J Epidemiol* 163: 860–869.
36. Haissman JM, Lasse SV, Sembuche S, Erikstrup C, Mmbando B, et al. (2009) Plasma Cytokine Levels in Tanzanian HIV-1-infected Adults and the Effect of Antiretroviral Treatment. *J Acquir Immune Defic Syndr* 52: 493–497.
37. Thoni GJ, Fedou C, Brun JF, Fabre J, Renard E, et al. (2002) Reduction of fat accumulation and lipid disorders by individualized light aerobic training in human immunodeficiency virus infected patients with lipodystrophy and/or dyslipidaemia. *Diabetes Metab* 28: 397–404.
38. Dolan SE, Frontera W, Librizzi J, Ljungquist K, Juan S, et al. (2006) Effects of a Supervised Home-based Aerobic and Progressive Resistance Training Regimen in Women Infected With Human Immunodeficiency Virus. A Randomized Trial. *Arch Int Med* 166: 1225–1231.
39. Driscoll SD, Meininger GE, Lareau MT, Dolan SE, Killilea KM, et al. (2004) Effects of exercise training and metformin on body composition and cardiovascular indices in HIV-infected patients. *AIDS* 18: 465–473.
40. Vlahakis SR, Bren GD, Algeciras-Schimmich A, Trushin SA, Schnepfle DJ, et al. (2007) Flying in the face of resistance: antiviral-independent benefit of HIV protease inhibitors on T-cell survival. *Clin Pharmacol Ther* 82: 294–299.
41. Gallego-Escuredo JM, Del Mar Gutierrez M, Diaz-Delfin J, Domingo JC, Mateo MG, et al. (2010) Differential effects of efavirenz and lopinavir/ritonavir on human adipocyte differentiation, gene expression and release of adipokines and pro-inflammatory cytokines. *Curr HIV Res* 8: 545–553.
42. Apostolova N, Gomez-Sucerquia LJ, Gortat A, Blas-Garcia A, Esplugues JV (2011) Compromising mitochondrial function with the antiretroviral drug efavirenz induces cell survival-promoting autophagy. *Hepatology* 54: 1009–1019.
